# Supplementary material
Source: PubMed Central journal article supplement (PMC3105658)
Supplement: 2010.033159_2.pdf [file 2010.033159_2.pdf]

**Manuscript no. HAEMATOL/2010/033159 entitled “Relationship between pharmacokinetic profile of subcutaneously administered alemtuzumab and clinical response in patients with chronic lymphocytic leukemia“**

**Authors: Michela Montagna, Marco Montillo, Maria A. Avanzini, Carmine Tinelli, Alessandra Tedeschi, Livia Visai, Francesca Ricci, Eleonora Vismara, Enrica Morra and Mario Regazzi.**

**Information about the contributions of each person named as having participated in the study**

**1) Guarantor(s), i.e., person(s) who is (are) responsible for the integrity of the work as a whole:**

- Michela Montagna, Clinical Pharmacokinetics Unit, Foundation IRCCS Policlinico San Matteo, Pavia, Italy. ([m.montagna@smatteo.pv.it](mailto:m.montagna@smatteo.pv.it))
- Mario Regazzi, Clinical Pharmacokinetics Unit, Foundation IRCCS Policlinico San Matteo, Pavia, Italy. ([regazzim@smatteo.pv.it](mailto:regazzim@smatteo.pv.it))

According to the International Committee of Medical Journal Editors (ICMJE)

([http://www.icmje.org/ethical\\_1author.html](http://www.icmje.org/ethical_1author.html)): “*Authorship credit should be based on: 1) substantial contributions to conception and design, acquisition of data, or analysis and interpretation of data; 2) drafting the article or revising it critically for important intellectual content; and 3) final approval of the version to be published. Authors should meet conditions 1, 2, and 3 ..... Acquisition of funding, collection of data, or general supervision of the research group alone does not constitute authorship*”.

The guarantors of this manuscript confirm that all persons designated as authors qualify for authorship, and that each author has participated sufficiently in the work to take public responsibility for appropriate portions of the content.

**2) Authors who participated in the conception of the study:**

- Michela Montagna, Clinical Pharmacokinetics Unit, Foundation IRCCS Policlinico San Matteo, Pavia, Italy. ([m.montagna@smatteo.pv.it](mailto:m.montagna@smatteo.pv.it))
- Mario Ragazzi, Clinical Pharmacokinetics Unit, Foundation IRCCS Policlinico San Matteo, Pavia, Italy. ([regazzim@smatteo.pv.it](mailto:regazzim@smatteo.pv.it))
- Marco Montillo, Division of Hematology, Niguarda Hospital, Milano, Italy; ([marco.montillo@ospedaleniguarda.it](mailto:marco.montillo@ospedaleniguarda.it))

**3) Design & Methods.** The following authors were responsible for specific investigations (please detail):

- Michela Montagna, Marco Montillo and Mario Regazzi were responsible of study design.
- Montagna Michela was responsible of samples analysis and collecting data.
- Alessandra Tedeschi, Francesca Ricci, Enrica Morra and Eleonora Vismara were responsible for clinical information.
- Carmine Tinelli was responsible for statistical analysis.
- Michela montagna, M. Antonia Avanzini and Livia Visai were responsible for ELISA assay.

**4) Results.** The following authors were responsible for specific portions of the results, including figures and tables (please indicate the person responsible for each figure and each table):

- Michela Montagna, Marco Montillo and Mario Regazzi were responsible for all the results, included figures and tables.
- Francesca Ricci, Eleonora Vismara and Alessandra Tedeschi were responsible for clinical data.

5) **Writing the manuscript.** The following authors were responsible for writing the manuscript:

- Michela Montagna, Marco Montillo and Mario Regazzi were responsible for writing the original draft and the final manuscript.
- Maria A. Avanzini, Carmine Tinelli, Alessandra Tedeschi, Livia Visai, Francesca Ricci, Eleonora Vismara and Enrica Morra revised the different versions and approved the final manuscript.

6) **Contributors Listed in Acknowledgments:** (We did not receive any external assistance with the study design, data collection, data analysis, or manuscript preparation.)
